# Supplementary material
Source: PubMed Central journal article supplement (PMC6044448)

**A**

| Model                            | Burst Freq. | $b_{P_{eff}}$ | $b_{r_{eff}}$ | T * | Analytical Prediction |          |             |                 | From Simulations |                     |             |                 |
|----------------------------------|-------------|---------------|---------------|-----|-----------------------|----------|-------------|-----------------|------------------|---------------------|-------------|-----------------|
|                                  |             |               |               |     | <P>                   | Variance | Fano factor | CV <sup>2</sup> | <P>              | Variance            | Fano factor | CV <sup>2</sup> |
| Two-state Model (High mean)      | 0.091       | 100           | 20            | 0   | 18182                 | 36363636 | 2000        | 0.11            | 17466 (±1060)    | 33912654 (±3230930) | 1954 (±311) | 0.11 (±0.02)    |
| Two-state Model (one-half mean)  | 0.046       | 100           | 20            | 0   | 9091                  | 18182000 | 2000        | 0.22            | 9614 (±27)       | 19601286 (±1077555) | 2039 (±118) | 0.21 (±0.01)    |
| Auto-repression (one-half mean)  | 0.046       | 100           | 20            | ≤ 1 | 9091                  | 9091000  | ≥ 1000      | ≥ 0.11          | 9049 (±89)       | 11189103 (±964941)  | 1237 (±114) | 0.14 (±0.01)    |
| Auto-depletion (one-half mean)   | 0.091       | 50            | 20            | ≤ 1 | 9091                  | 6060606  | ≥ 500       | ≥ 0.055         | 9336 (±164)      | 5716108 (±381944)   | 612 (±30)   | 0.07 (±0.01)    |
| Auto-repression (one-third mean) | 0.030       | 100           | 20            | ≤ 2 | 6061                  | 8661169  | ≥ 667       | ≥ 0.11          | 5248 (±219)      | 6611475 (±163289)   | 1260 (±21)  | 0.24 (±0.01)    |
| Auto-depletion (one-third mean)  | 0.091       | 33.3          | 20            | ≤ 2 | 6061                  | 2000130  | ≥ 222       | ≥ 0.037         | 5078 (±13)       | 1675023 (±126109)   | 330 (±26)   | 0.06 (±0.01)    |

\*For the analytical predictions the linear feedback approximation was used where  $|T| = \frac{\langle p \rangle_{NFB}}{\langle p \rangle_{FB}} - 1$ . The subscript NFB means without feedback and the subscript FB means with feedback. Since the linear feedback approximation does not saturate, it overestimates the magnitude of  $|T|$  for realistic repression relationships that do saturate. Accordingly, the analytical predictions for Fano factor and CV<sup>2</sup> should be interpreted as lower limits.

**B**

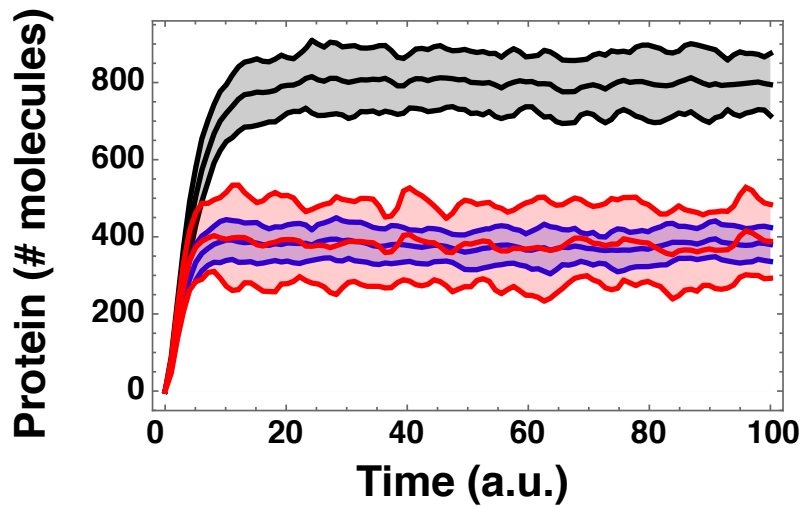

**C**

|                 | Two State | Two State (lower mean) | Transcriptional Negative FB | Precursor Depletion FB | Simple RNA Depletion FB |
|-----------------|-----------|------------------------|-----------------------------|------------------------|-------------------------|
| Mean            | 800       | 400                    | 381                         | 376                    | 381                     |
| CV <sub>2</sub> | 0.01      | 0.025                  | 0.07                        | 0.009                  | 0.008                   |
| Fano            | 8.5       | 9.5                    | 30                          | 5.6                    | 3.2                     |

**D**

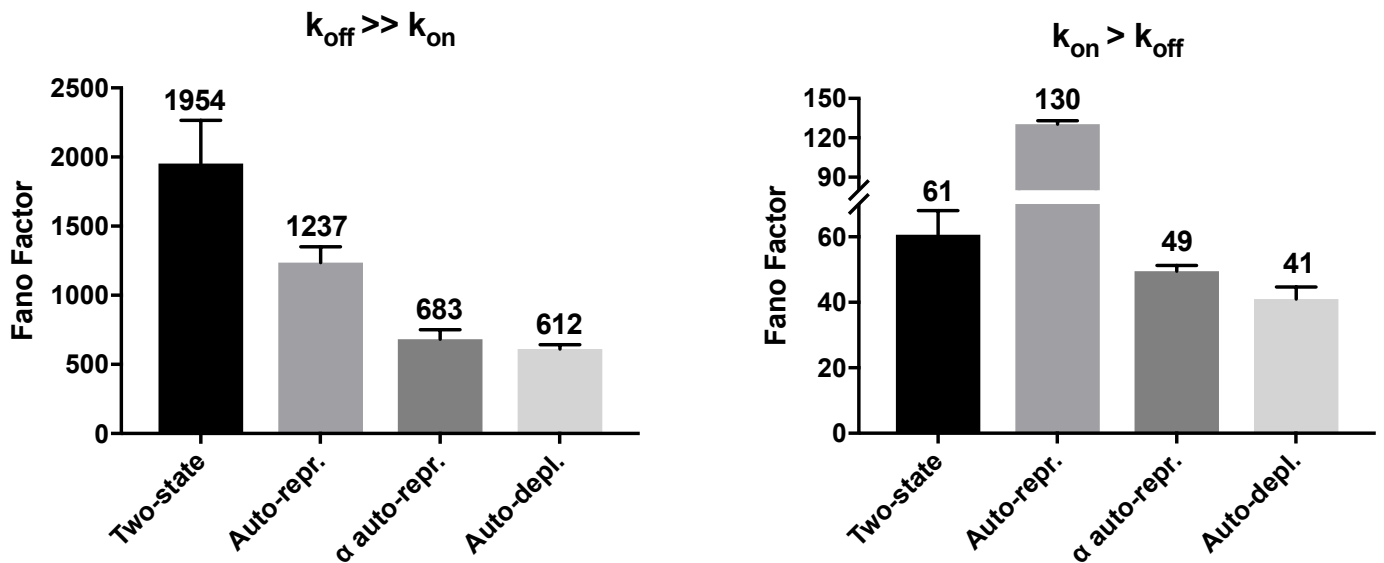

Supplement: NIHMS966030-supplement-1.pdf [file NIHMS966030-supplement-1.pdf]
