# Supplementary material
Source: PubMed Central journal article supplement (PMC6044448)

**A**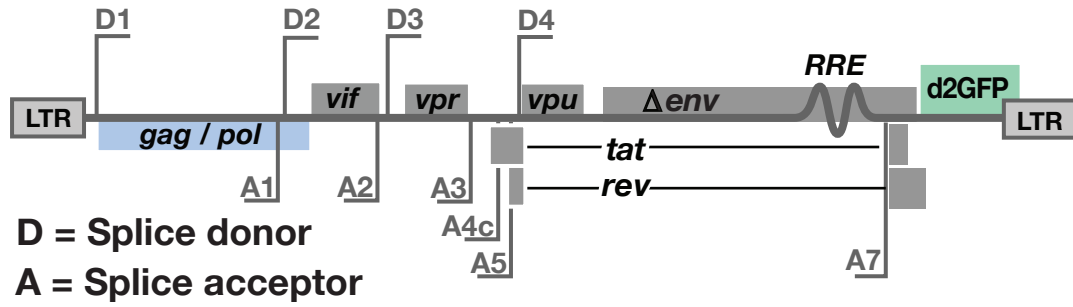**B**

Cellular RNA collected 4 hours post TNF activation

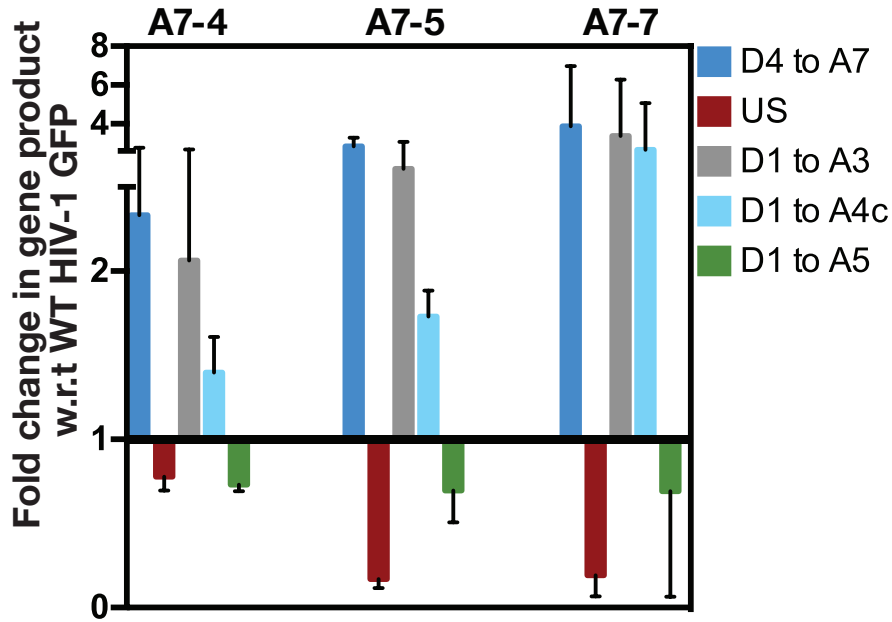

Cellular protein 20 hours post TNF activation

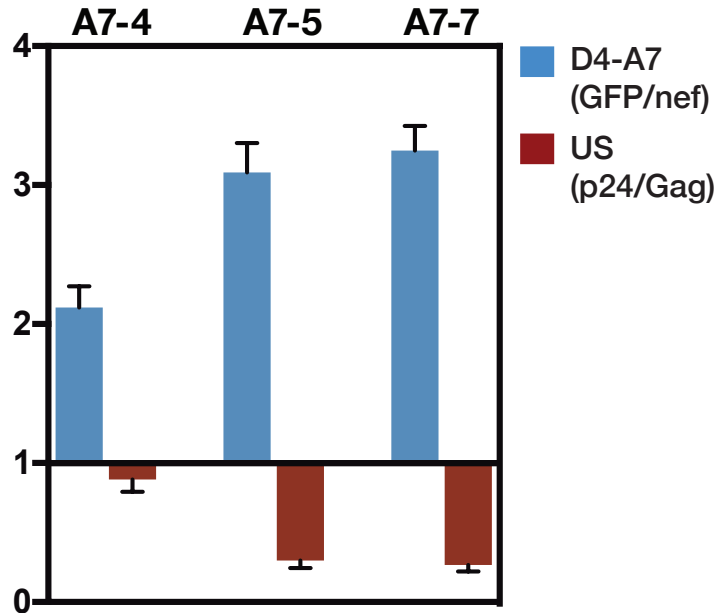**C**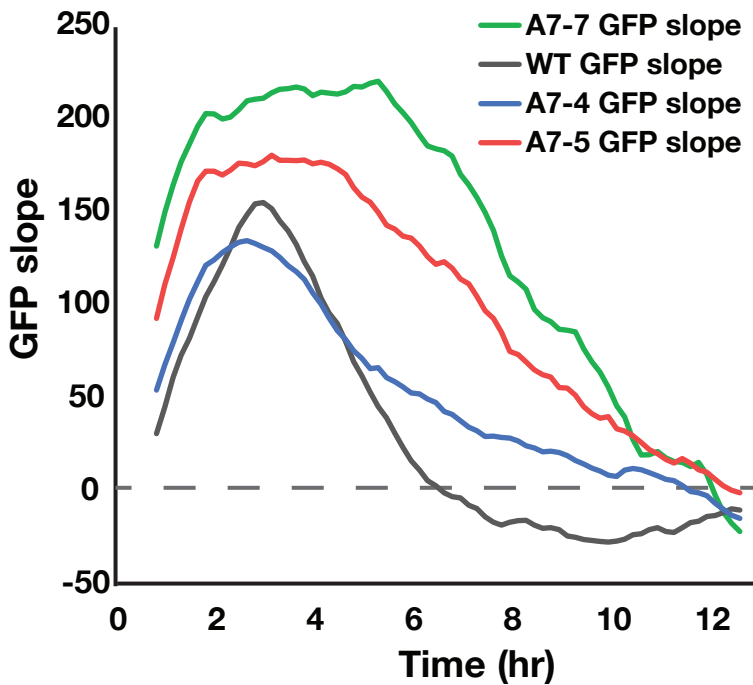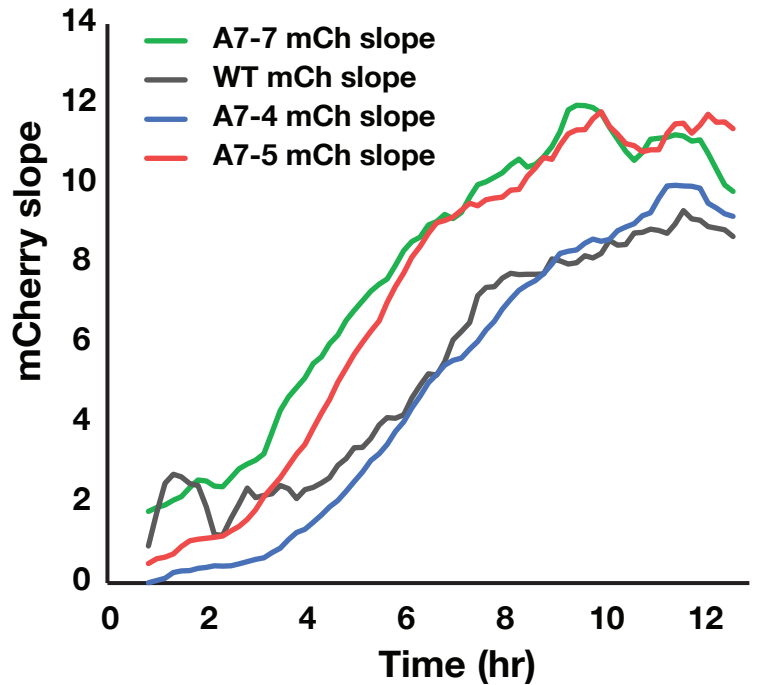

Supplement: NIHMS966030-supplement-6.pdf [file NIHMS966030-supplement-6.pdf]
