# Supplementary material
Source: PubMed Central journal article supplement (PMC6044448)
Supplement: NIHMS966030-supplement-10.pdf [file NIHMS966030-supplement-10.pdf]

**Supplementary Tables S1: Probes for smFISH, related to Figure 3**

**US Probe sequences**

| US Probe # | Sequence           |
|------------|--------------------|
| 1          | tgttttactggccatct  |
| 2          | ttgctgccattgtctgta |
| 3          | aggcggccttaactgtag |
| 4          | tgccaaattcctgcttga |
| 5          | actccttgactttgggga |
| 6          | tctcttacctgtcctata |
| 7          | tcttaagatgttcagcct |
| 8          | tactgccattgtactgc  |
| 9          | cccccttttctttaaa   |
| 10         | tctactattcttccct   |
| 11         | gttgatgtctgttgct   |
| 12         | tctgctgcctgtaata   |
| 13         | ggcctttccaaactgga  |
| 14         | ccttccagaggagcttt  |
| 15         | ttgtattactactgcccc |
| 16         | tcttcttggeactacttt |
| 17         | tccctgatgatctttgct |
| 18         | ctgceatctgtttccat  |
| 19         | ctgtctacttgccacaca |
| 20         | tccatgtgtaatcctca  |
| 21         | agtccttagctttccttg |
| 22         | tgggatgtgtacttctga |
| 23         | actaatttagcatccct  |
| 24         | cagacccaatatgttg   |
| 25         | cagtctctttctctgta  |
| 26         | agactccctgacccaat  |
| 27         | ctcttttctcctcattct |

## SS Probe sequences

| SS Probe # | Sequence           |
|------------|--------------------|
| 1          | cctcctgaggattgctta |
| 2          | gcgttacaatttctgggt |
| 3          | attcccctccacaattaa |
| 4          | cccttcagtactccaagt |
| 5          | cttcctcagtgattatt  |
| 6          | atgggagtgattgtgt   |
| 7          | ctgatgggaggggcatac |
| 8          | gcagcccagtaataattg |
| 9          | accaccatctcttgtaa  |
| 10         | tggaccattgttgta    |
| 11         | ctcctccaggtctgaaga |
| 12         | ctccaattgtccctcata |
| 13         | gggtgctactcctaattg |
| 14         | caccactctctctttgc  |
| 15         | aaagtcctattcccact  |
| 16         | cagcgtcattgaccgtgc |
| 17         | aattgctggcctgtacc  |
| 18         | gttctgctgctgcactat |
| 19         | ctcaatagccctcagcaa |
| 20         | ttgatgccccagactgtg |
| 21         | caggattcttgctggag  |
| 22         | ccttaggtatctttcca  |
| 23         | aaatccccaggagctgtt |
| 24         | gagttttccagagcaacc |
| 25         | ctagcattccaaggcaca |
| 26         | ccaaatctgtccagaga  |
| 27         | tccatccaggtcatgtta |
| 28         | tgftaatttctctgtccc |
| 29         | ttcttgctggtttgcga  |
| 30         | tccacaaactgcccatt  |

### MS Probe sequences

| MS Probe # | Sequence           |
|------------|--------------------|
| 1          | cggtgaacagctcctcgc |
| 2          | cagctcgaccaggatggg |
| 3          | ctgaactgtggccgtt   |
| 4          | gccggtggtgcagatgaa |
| 5          | agggtggtcacgagggtg |
| 6          | aagcactgcacgccgtag |
| 7          | atgtggtcggggtagcgg |
| 8          | tgaagaagtcgtgctgct |
| 9          | acgtagccttcgggcatg |
| 10         | agaagatggtgcgctcct |
| 11         | tctttagttgccgtcgt  |
| 12         | tgaacttcacctcggcg  |
| 13         | tcgatcgggtcaccagg  |
| 14         | tgaagtcgatgccctca  |
| 15         | caggatgttccgtcctc  |
| 16         | cgttgtggctgtttagt  |
| 17         | gcttgcggccatgatat  |
| 18         | gtcctcgatgttggcg   |
| 19         | tagtggtcggcgagctgc |
| 20         | cgatgggggtgttctgct |
| 21         | ttgctgggcagcagcacg |
| 22         | gactgggtgctcaggtag |
| 23         | gttgggtctttgctcag  |
| 24         | accatgtgatcgcgcttc |
| 25         | cggtcacgaactccagca |
| 26         | cttgtagctcgtccat   |
| 27         | cgggaagccatggctaag |
| 28         | ctcctgggcacaagacat |
| 29         | tgcagggtgacggtccat |
| 30         | gatcctagcagaagcaca |
