# Supplementary material
Source: PubMed Central journal article supplement (PMC6044448)

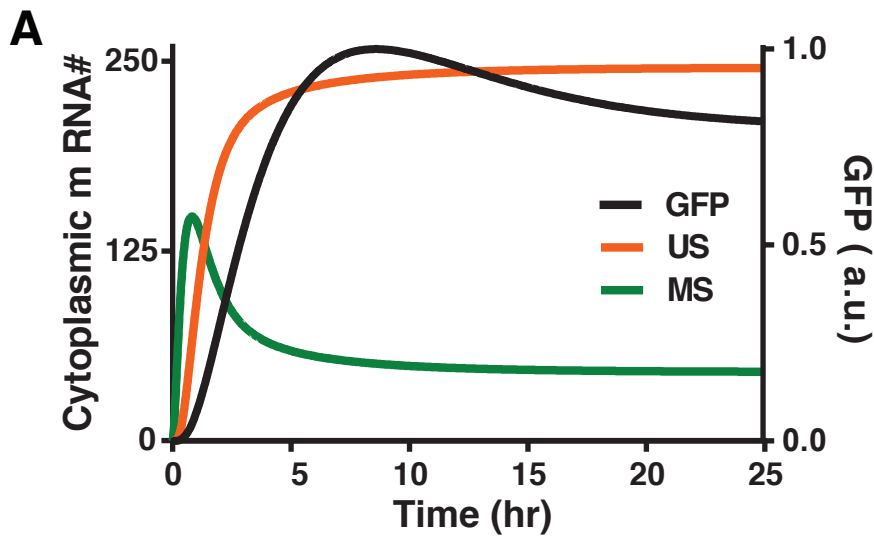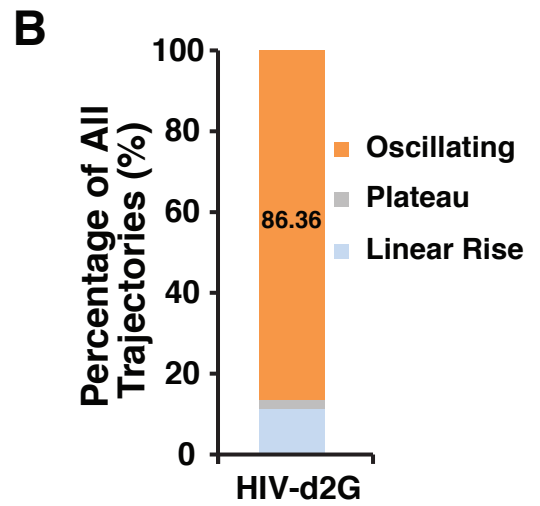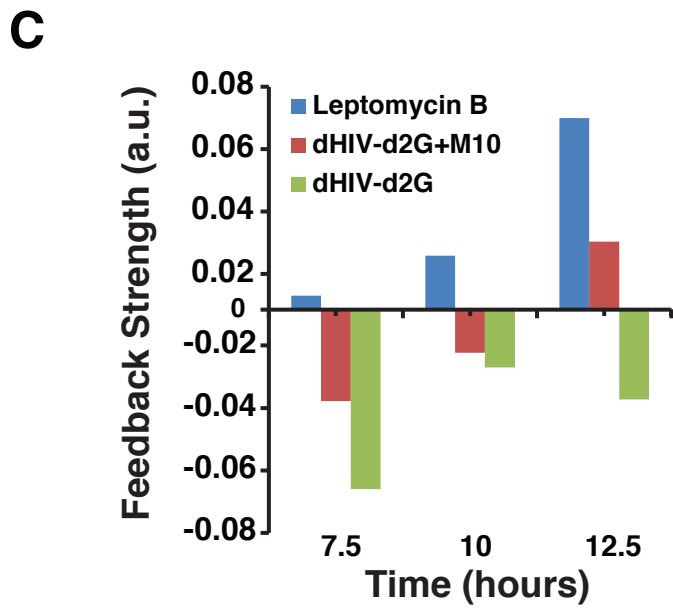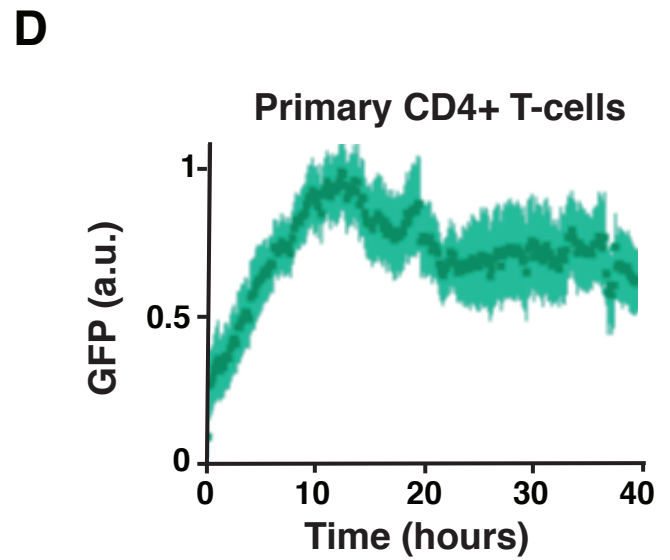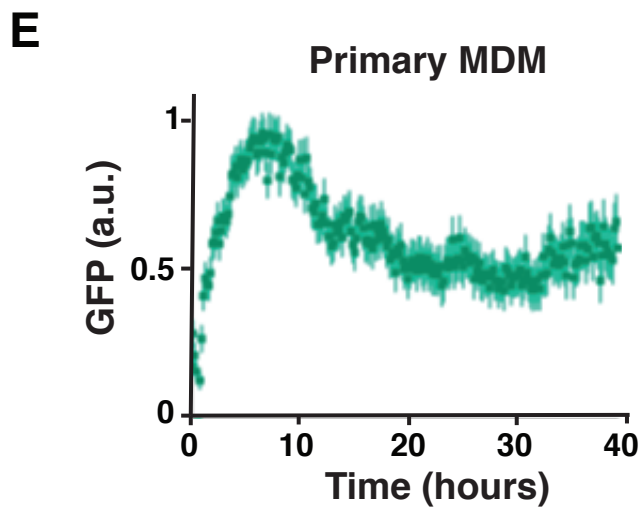

Supplement: NIHMS966030-supplement-3.pdf [file NIHMS966030-supplement-3.pdf]

**A**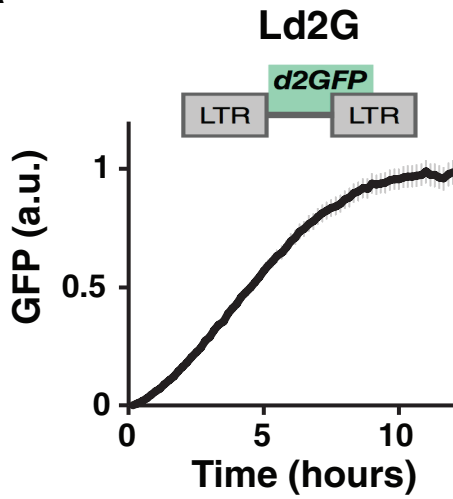**B**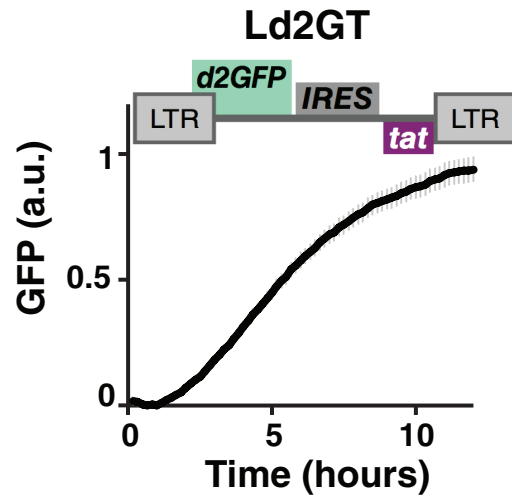**C**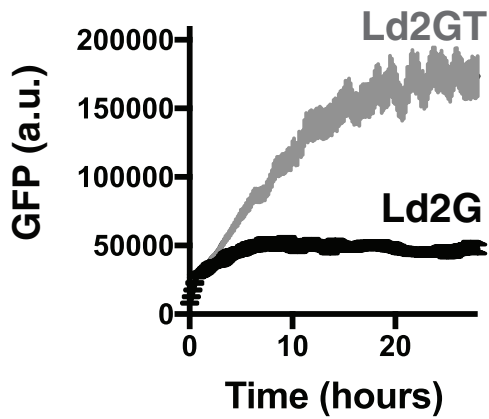**D**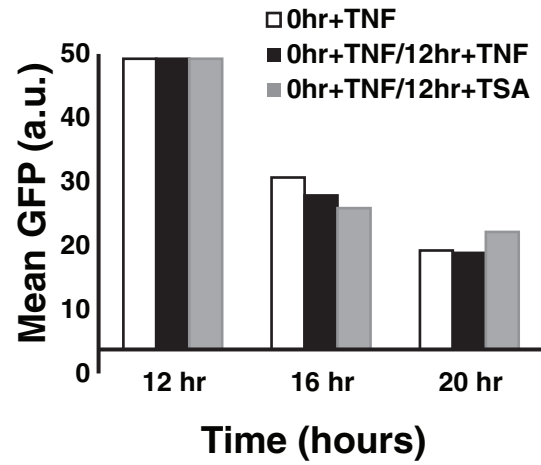**E**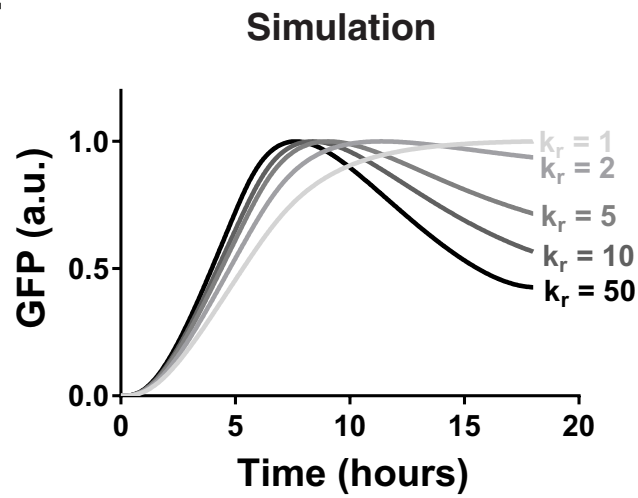**F**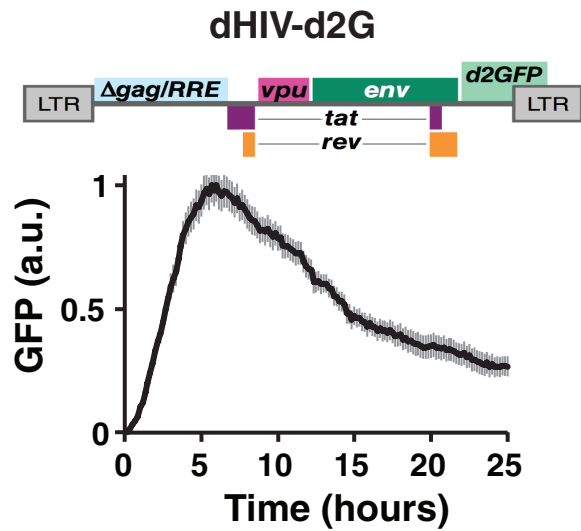

Supplement: NIHMS966030-supplement-4.pdf [file NIHMS966030-supplement-4.pdf]

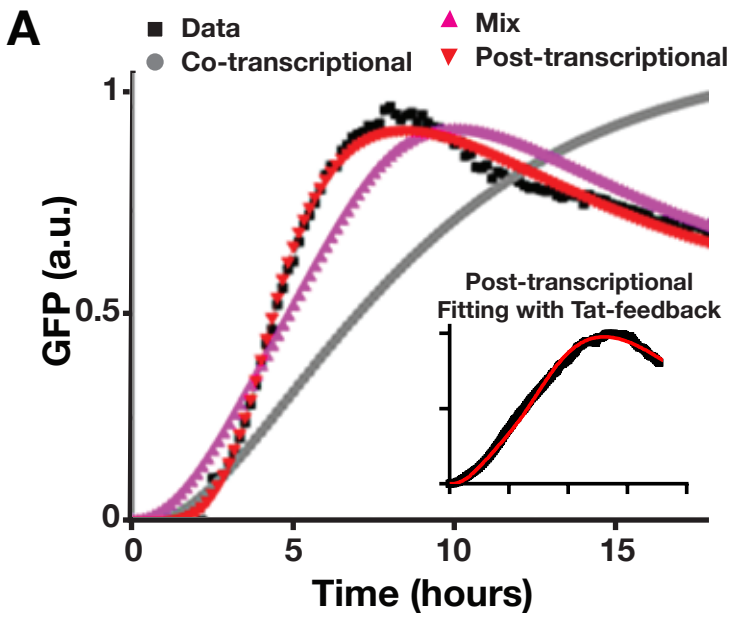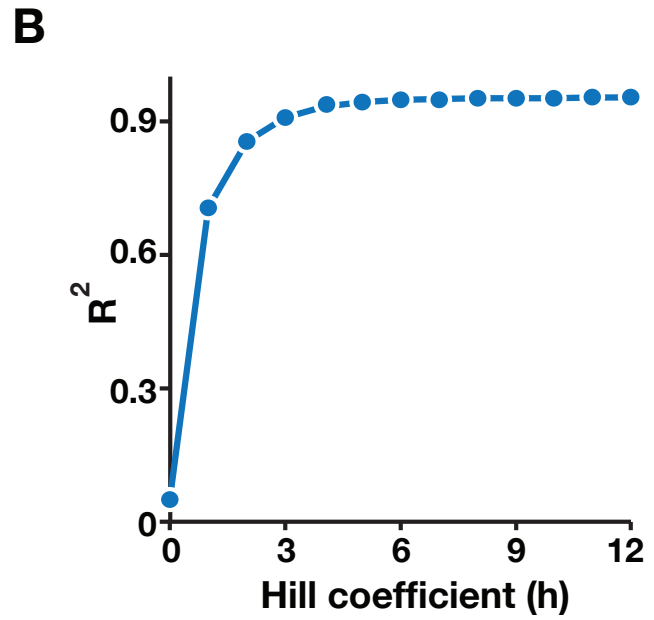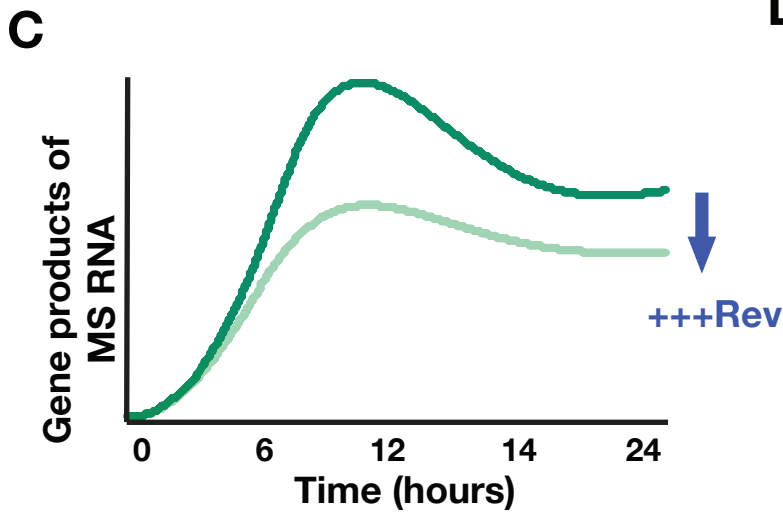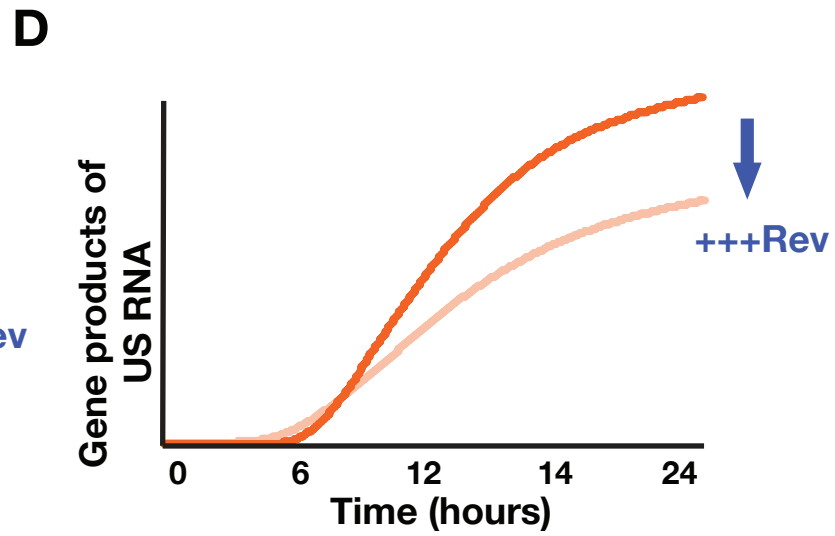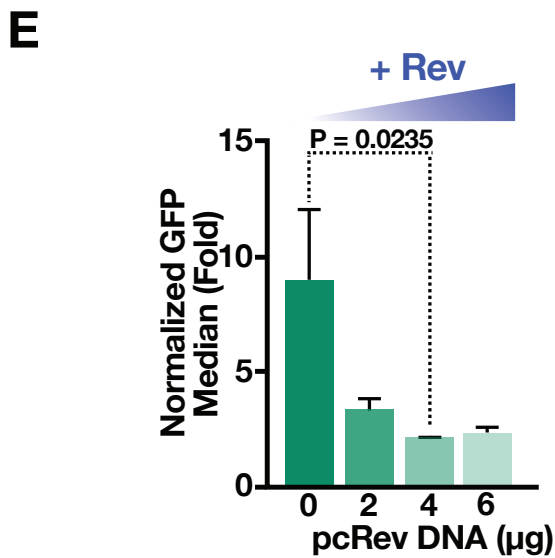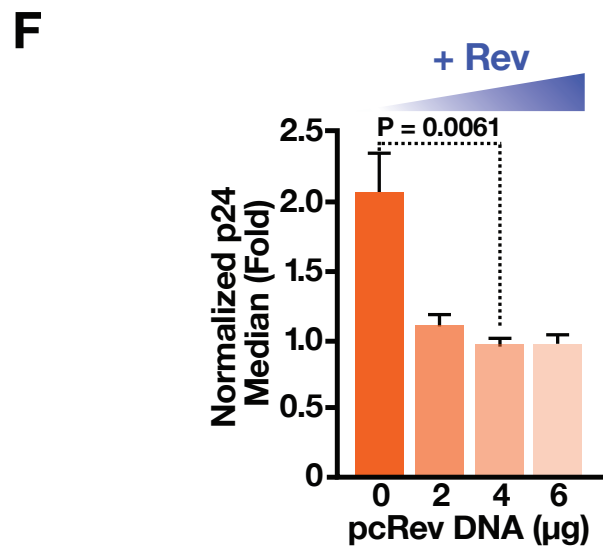

Supplement: NIHMS966030-supplement-5.pdf [file NIHMS966030-supplement-5.pdf]

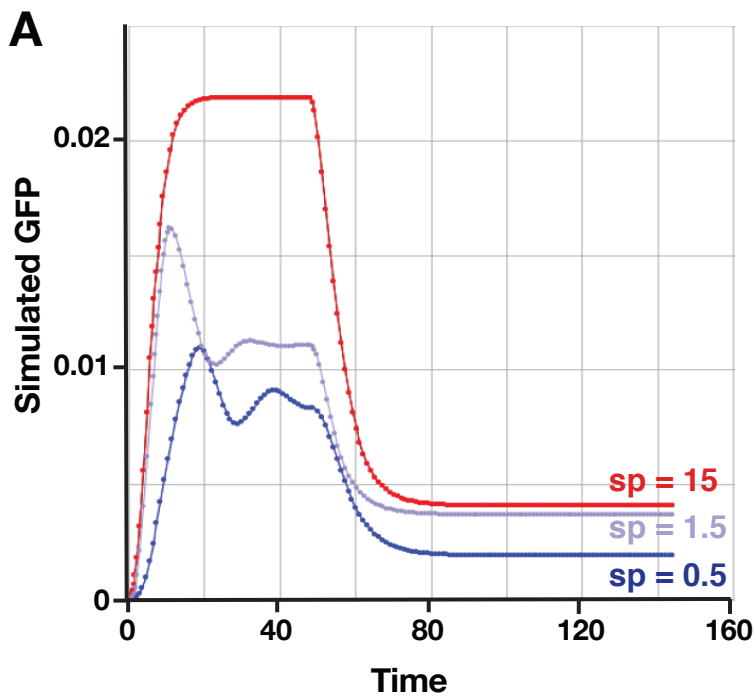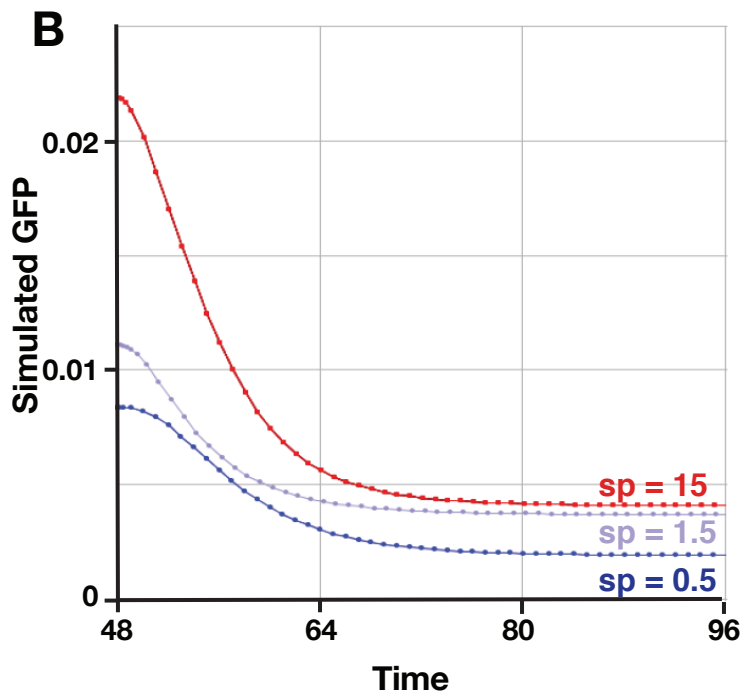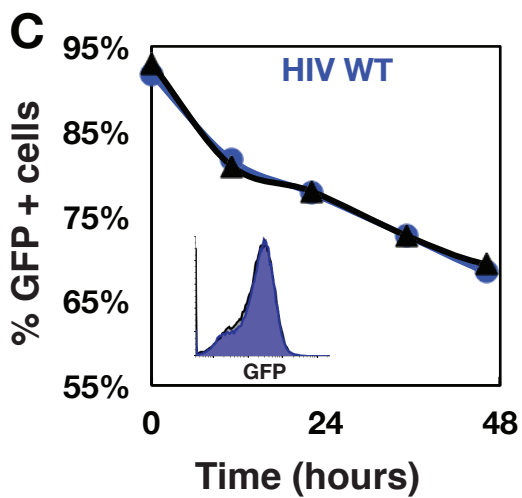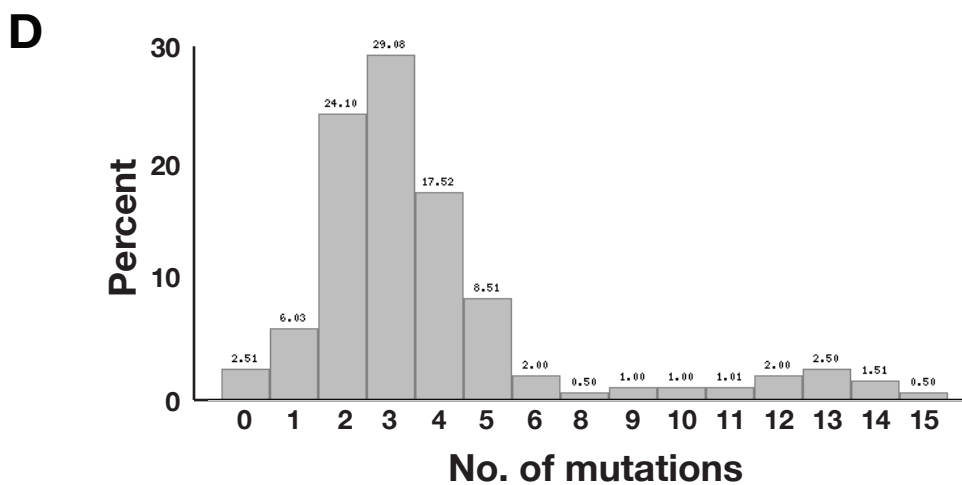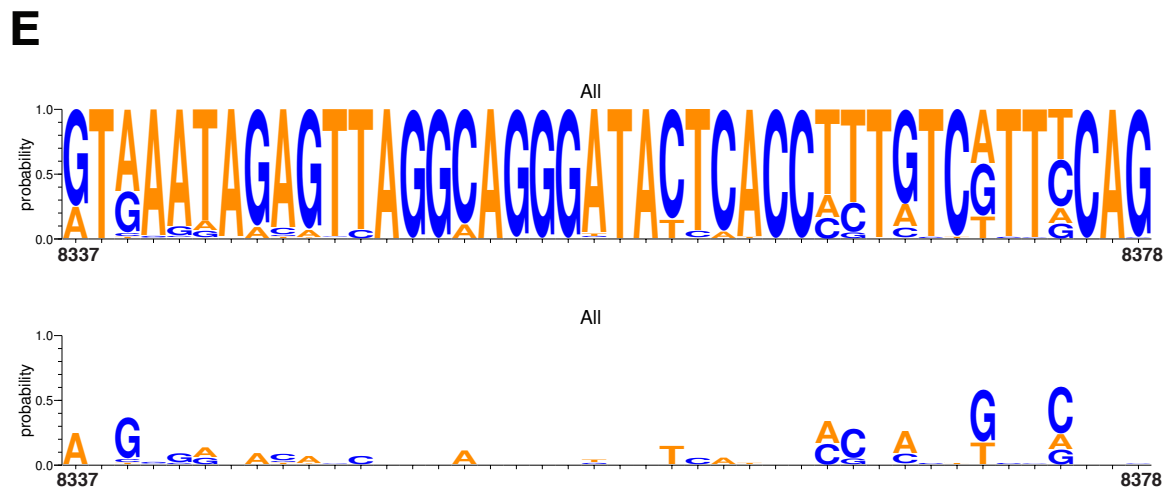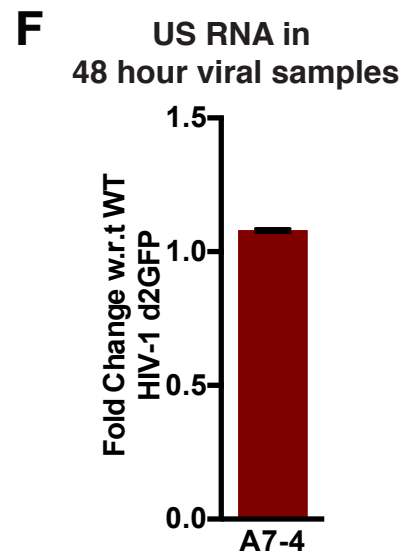

Supplement: NIHMS966030-supplement-7.pdf [file NIHMS966030-supplement-7.pdf]
